# Supplementary material for: Using PIM-Taiwan, PRISCUS, and Beers criteria to assess potentially inappropriate medication use among older adults with 90-day rehospitalization: a population-based study in Taiwan
Source: PubMed Central journal article supplement (PMC10374845; doi:10.3389/fphar.2023.1194537), 2023-07-13
Supplement: Table1.pdf [file Table1.pdf]

**Table S1 |** Drugs with ATC code in PIM-Taiwan 2018

| <b>Category</b>         | <b>Subtypes</b>                              | <b>Drugs name (ATC code)</b>                                                           |
|-------------------------|----------------------------------------------|----------------------------------------------------------------------------------------|
| Cardiovascular System   | Aldosterone antagonist                       | Spironolactone (C03DA01)                                                               |
|                         | Antiarrhythmic                               | Amiodarone (C01BD01)                                                                   |
|                         | Central alpha blockers                       | Clonidine (C02AC01)                                                                    |
|                         | Digitalis glycosides                         | Digoxin >0.125mg/day (C01AA05)                                                         |
|                         | Peripheral alpha-1 blockers                  | Prazosin (C02CA01), Doxazosin (C02CA04), Terazosin (G04CA03)                           |
| Endocrine system        | Sulfonylureas, long-duration                 | Glyburide (A10BB01), Chlorpropamide (A10BB02)                                          |
|                         | Thiazolidinediones                           | Pioglitazone (A10BG03)                                                                 |
| Gastrointestinal system | H2-recepto antagonist                        | Cimetidine (A02BA01), Ranitidine (A02BA02), Famotidine (A02BA03), Nizatidine (A02BA04) |
|                         | Propulsives                                  | Metoclopramide (A03FA01)                                                               |
|                         | Anticholinergic agents                       | Clidinium and chlordiazepoxide (A03CA02)                                               |
| Genitourinary system    | Drugs for urinary frequency and incontinence | Oxybutynin (G04BD04), Tolterodine (G04BD07)                                            |

|                        |                                                                   |                                                                                                                                                                                                                                                                                                                                                                                                                                                                                                                                                                                                          |
|------------------------|-------------------------------------------------------------------|----------------------------------------------------------------------------------------------------------------------------------------------------------------------------------------------------------------------------------------------------------------------------------------------------------------------------------------------------------------------------------------------------------------------------------------------------------------------------------------------------------------------------------------------------------------------------------------------------------|
| Musculoskeletal system | Non-COX-2 selective nonsteroidal anti-inflammatory drugs (NSAIDs) | Indomethacin (M01AB01), Sulindac (M01AB02), Tolmetin (M01AB03), Diclofenac (M01AB05), Alclofenac (M01AB06), Etodolac (M01AB08), Acemetacin (M01AB11), Ketorolac (M01AB15), Aceclofenac (M01AB16), Piroxicam (M01AC01), Tenoxicam (M01AC02), Meloxicam (M01AC06), Ibuprofen (M01AE01), Naproxen (M01AE02), Ketoprofen (M01AE03), Fenoprofen (M01AE04), Febufen (M01AE05), Flubiprofen (M01AE09), Tiaprofenic acid (M01AE11), Mefenamic acid (M01AG01), Flufenamic acid (M01AG03), Meclofenamic acid (M01AG04), Nabumetone (M01AX01), Niflumic acid (M01AX02), Benzydamine (M01AX07), Nimesulide (M01AX17) |
| Central nervous system | Antidepressants (including SSRIs and SNRIs)                       | Paroxetine (N06AB05), Melitracen and psycholeptics (N06CA02), Maprotiline (N06AA21), Imipramine (N06AA02), Clomipramine (N06AA04), Amitriptyline (N06AA09), Doxepin (N06AA12)                                                                                                                                                                                                                                                                                                                                                                                                                            |
|                        | Antiparkinsonian agents                                           | Trihexyphenidyl (N04AA01), Biperiden (N04AA02)                                                                                                                                                                                                                                                                                                                                                                                                                                                                                                                                                           |
|                        | Antipsychotics, first-generation (conventional)                   | Chlorpromazine (N05AA01), Levomepromazine (N05AA02), Fluphenazine (N05AB02), Perphenazine (N05AB03), Trifluoperazine (N05AB06), Thioridazine (N05AC02), Haloperidol (N05AD01), Flupentixol (N05AF01), Chlorprothixene (N05AF03), Pimozide (N05AG02), Loxapine (N05AH01), Sulpride (N05AL01)                                                                                                                                                                                                                                                                                                              |
|                        | Antipsychotics, second-generation (atypical)                      | Ziprasidone (N05AE04), Lurasidone (N05AE05), Clozapine (N05AH02), Olanzapine (N05AH03), Amisulpride (N05AL05), Risperidone (N05AX08), Zotepine (N05AX11), Aripiprazole (N05AX12), Paliperidone (N05AX13)                                                                                                                                                                                                                                                                                                                                                                                                 |

|                    |                                 |                                                                                                                                                                                                                                                                                                                                                                                                                                                                                                                                                                                                                                                                                                                                                                                                                                                               |
|--------------------|---------------------------------|---------------------------------------------------------------------------------------------------------------------------------------------------------------------------------------------------------------------------------------------------------------------------------------------------------------------------------------------------------------------------------------------------------------------------------------------------------------------------------------------------------------------------------------------------------------------------------------------------------------------------------------------------------------------------------------------------------------------------------------------------------------------------------------------------------------------------------------------------------------|
|                    | Benzodiazepines                 | Clonazepam (N03AE01), Diazepam (N05BA01), Medazepam (N05BA03), Oxazepam (N05BA04), Lorazepam (N05BA06), Bromazepam (N05BA08), Clobazem (N05BA09), Prazepam (N05BA11), Alprazolam (N05BA12), Nordazepam (N05BA16), Fludiazepam (N05BA17), Oxazolam (N05BA91), Flurazepam (N05CD01), Nitrazepam (N05CD02), Flunitrazepam (N05CD03), Estazolam (N05CD04), Triazolam (N05CD05), Midazolam (N05CD08), Brotizolam (N05CD09)                                                                                                                                                                                                                                                                                                                                                                                                                                         |
|                    | Non-benzodiazepines             | Zopiclone (N05CF01), Zolpidem (N05CF02), Zaleplon (N05CF03), Eszopiclone (N05CF04)                                                                                                                                                                                                                                                                                                                                                                                                                                                                                                                                                                                                                                                                                                                                                                            |
| Respiratory system | First-generation antihistamines | Brompheniramine combinations (R06AB01), Triprolidine combinations (R06AX07), Dexchlorpheniramine combinations (R05X), Diphenhydramine (R06AA02), Dimenhydrinate (R06AA02), Clemastine (R06AA04), Diphenylpyraline (R06AA07), Carbinoxamine (R06AA08), Doxylamine (R06AA09), Diphenhydramine combinations (R06AA52), Diphenylpyraline combinations (R06AA57), Brompheniramine (R06AB01), Dexchlorpheniramine (R06AB02), Chlorpheniramine (R06AB04), Promethazine (R06AD02), Mequitazine (R06AD07), Buclizine (R06AE01), Cyclizine (R06AE03), Chlorcyclizine (R06AE04), Meclizine (R06AE05), Oxatomide (R06AE06), Buclizine combinations (R06AE51), Meclizine combinations (R06AE55), Homochlorcyclizine (R06AE91), Cyproheptadine (R06AX02), Phenindamine (R06AX04), Triprolidine (R06AX07), Mebhydrolin (R06AX15), Ketotifen (R06AX17), Hydroxyzine (N05BB01) |
| Sex hormones       | Androgens                       | Methyltestosterone (G03BA02), Testosterone (G03BA03)                                                                                                                                                                                                                                                                                                                                                                                                                                                                                                                                                                                                                                                                                                                                                                                                          |

Estrogens (combinations) Estradiol (G03CA03), Estriol (G03CA04), Estrone (C03CA07), Estradiol combinations (G03CA53), Conjugated estrogens (G03CA57), Norethisterone and estrogen (G03FA01), Hydroxyprogesterone and estrogen(G03FA02), Progesterone and estrogen (G03FA04), Norgestrel and estrogen (G03FA10), Medroxyprogesterone and estrogen (G03FA12)

---

**Table S2 |** Drugs with ATC code in Beers criteria 2019

| Category                | Subtypes                      | Drugs name (ATC code)                                                                                                                                                                                                                                                                                                                                                                                                                               |
|-------------------------|-------------------------------|-----------------------------------------------------------------------------------------------------------------------------------------------------------------------------------------------------------------------------------------------------------------------------------------------------------------------------------------------------------------------------------------------------------------------------------------------------|
| Cardiovascular System   | Peripheral alpha-1 blockers   | Doxazosin(C02CA04), Prazosin(C02CA01), Terazosin(G04CA03)                                                                                                                                                                                                                                                                                                                                                                                           |
|                         | Central alpha-agonists        | Clonidine(C02AC01), Methyldopa (C02AB01), <b>Guanabenz*</b> (N/A), <b>Guanfacine*</b> (C02AC02), Reserpine >0.1mg/day(C02AA02)                                                                                                                                                                                                                                                                                                                      |
|                         | Cardiovascular                | Disopyramide (C01BA03), Dronedarone (C01BD07), Digoxin (C01AA05), Nifedipine immediate release (C08CA05), Amiodarone (C01BD01)                                                                                                                                                                                                                                                                                                                      |
| Endocrine system        | Insulins                      | Human insulin (A10AB01, A10AC01), Pork insulin (A10AB03, A10AC03, A10AC30), Insulin lispro (A10AB04), Insulin aspart (A10AB05), Fast-acting insulin combinations (A10AB30)                                                                                                                                                                                                                                                                          |
|                         | Sulfonylureas                 | Chlorpropamide (A10BB02), Glimepiride (A10BB12), Glyburide (A10BB01)                                                                                                                                                                                                                                                                                                                                                                                |
| Gastrointestinal system | Gastrointestinal              | Metoclopramide (A03FA01), <b>Mineral oil oral* (A06AA01)</b>                                                                                                                                                                                                                                                                                                                                                                                        |
|                         | Proton-pump inhibitors (PPIs) | Omeprazole (A02BC01), Pantoprazole (A02BC02), Lansoprazole (A02BC03), Rabeprazole (A02BC04), Esomeprazole (A02BC05), Dexlansoprazole (A02BC06)                                                                                                                                                                                                                                                                                                      |
|                         | Antispasmodics                | Atropine excludes ophthalmic (A03BA01)                                                                                                                                                                                                                                                                                                                                                                                                              |
|                         | Belladonna alkaloids          | Butylscopolamine (A03BB01), Methylatropine (A03BB02), Belladonna with psycholeptics (A03CB), belladonna total alkaloids and psycholeptics (A03CB02), Hyoscyamine and psycholeptics (A03CB31), Butylscopolamine and analgesics (A03DB04), Clidinium-chlordiazepoxide (A03CA02), Dicyclomine (A03AA07), Homatropine excludes ophthalmic (A03BA91), Hyoscyamine (A03BA03), Methylscopolamine (A03BB03), Propantheline (A03AB05), Scopolamine (A04AD01) |

|                        |                                                 |                                                                                                                                                                                                                                                                                                                                                                                                                                            |
|------------------------|-------------------------------------------------|--------------------------------------------------------------------------------------------------------------------------------------------------------------------------------------------------------------------------------------------------------------------------------------------------------------------------------------------------------------------------------------------------------------------------------------------|
| Musculoskeletal system | Non-steroidal anti-inflammatory drugs (NSAIDs)  | Aspirin >325mg/day (B01AC06), Diclofenac (M01AB05), Diflunisal (N02BA11), Etodolac (M01AB08), Fenoprofen (M01AE04), Ibuprofen (M01AE01), Ketoprofen (M01AE03), Meclofenamate (M01AG04), Mefenamic acid (M01AG01), Meloxicam (M01AC06), Nabumetone (M01AX01), Naproxen (M01AE02), <b>Oxaprozin*</b> (M01AE12), Piroxicam (M01AC01), Sulindac (M01AB02), Tolmetin (M01AB03), Indomethacin (M01AB01), Ketorolac includes parenteral (M01AB15) |
|                        | Skeletal muscle relaxants                       | Carisoprodol (M03BA02), Chlorzoxazone (M03BB03), Cyclobenzaprine (M03BX08), <b>Metaxalone*</b> (N/A), Methocarbamol (M03BA03), Orphenadrine (M03BC01)                                                                                                                                                                                                                                                                                      |
|                        | Others                                          | Meperidine=Pethidine (N02AB02)                                                                                                                                                                                                                                                                                                                                                                                                             |
| Central nervous system | Antidepressants                                 | Amitriptyline (N06AA09), <b>Amoxapine*</b> (N06AA17), Clomipramine (N06AA04), <b>Desipramine*</b> (N06AA01), Doxepin >6mg/day (N06AA12), Imipramine (N06AA02), <b>Nortriptyline*</b> (N06AA10), Paroxetine (N06AB05), Protriptyline* (N06AA11), <b>Trimipramine*</b> (N06AA06)                                                                                                                                                             |
|                        | Antipsychotics, first-generation (conventional) | Chlorpromazine (N05AA01), Levomepromazine (N05AA02), Fluphenazine (N05AB02), Perphenazine (N05AB03), Trifluoperazine (N05AB06), Thioridazine (N05AC02), Haloperidol (N05AD01), Flupentixol (N05AF01), Chlorprothixene (N05AF03), Pimozide (N05AG02), Loxapine (N05AH01), Sulpride (N05AL01)                                                                                                                                                |
|                        | Antipsychotics, second-generation (atypical)    | Ziprasidone (N05AE04), Lurasidone (N05AE05), Clozapine (N05AH02), Olanzapine (N05AH03), Amisulpride (N05AL05), Risperidone (N05AX08), Zotepine (N05AX11), Aripiprazole (N05AX12), Paliperidone (N05AX13)                                                                                                                                                                                                                                   |

|                    |                                 |                                                                                                                                                                                                                                                                                                                                                                                                                                                      |
|--------------------|---------------------------------|------------------------------------------------------------------------------------------------------------------------------------------------------------------------------------------------------------------------------------------------------------------------------------------------------------------------------------------------------------------------------------------------------------------------------------------------------|
|                    | Barbiturates                    | Amobarbital(N05CA02), <b>Butobarbital*</b> (N/A), <b>Butalbital*</b> (N/A), <b>Methylphenobarbital*</b> (N03AA01), Pentobarbital (N05CA01), Phenobarbital (N03AA02), Secobarbital (N05CA06)                                                                                                                                                                                                                                                          |
|                    | Benzodiazepines                 | Alprazolam (N05BA12), Estazolam (N05CD04), Lorazepam (N05BA06), Oxazepam (N05BA04), Temazepam (N05CD07), Triazolam (N05CD05), Chlordiazepoxide (N05BA02), Chlordiazepoxide in combination with Amitriptyline or Clidinium (N06CA01), Clonazepam (N03AE01), Clorazepate (N05BA05), Diazepam (N05BA01), Flurazepam (N05CD01), <b>Quazepam* (N05CD10)</b>                                                                                               |
|                    | Non-benzodiazepines             | Eszopiclone(N05CF04), Zaleplon(N05CF03), Zolpidem(N05CF02)                                                                                                                                                                                                                                                                                                                                                                                           |
|                    | Antiparkinsonian                | Benzotropine oral (N04AC01), Trihexyphenidyl (N04AA01)                                                                                                                                                                                                                                                                                                                                                                                               |
|                    | Ergot alkaloids                 | Ergoloid mesylates (C04AE01)                                                                                                                                                                                                                                                                                                                                                                                                                         |
|                    | Others                          | Isoxsuprine (C04AA01), Meprobamate (N05BC01)                                                                                                                                                                                                                                                                                                                                                                                                         |
| Respiratory system | First-generation antihistamines | Brompheniramine (R06AB01), Carbinoxamine (R06AA08), Chlorpheniramine (R06AB04), Chlorphenamine combination (R06AB54), Clemastine (R06AA04), Cyproheptadine (R06AX02), <b>Dexbrompheniramine* (R06AB06)</b> , Dexchlorpheniramine (R06AB02), Dimenhydrinate (R06AA02), Diphenhydramine oral (R06AA02), Doxylamine (R06AA09), Hydroxyzine (N05BB01), Meclizine (R06AE05), Promethazine (R06AD02), <b>Pyrilamine* (R06AC01)</b> , Triprolidine(R06AX07) |
| Sex hormones       | Androgens                       | Methyltestosterone (G03BA02), Testosterone (G03BA03)                                                                                                                                                                                                                                                                                                                                                                                                 |

|                                |                 |                                                                                                                                                                                                                                                                                                                                                     |
|--------------------------------|-----------------|-----------------------------------------------------------------------------------------------------------------------------------------------------------------------------------------------------------------------------------------------------------------------------------------------------------------------------------------------------|
|                                | Estrogens       | Estradiol (G03CA03), Estriol (G03CA04), estradiol combinations (G03CA53), Conjugated estrogens (G03CA57), Norethisterone and estrogen (G03FA01), Hydroxyprogesterone and estrogen (G03FA02), Ethisterone and estrogen (G03FA03), Progesterone and estrogen (G03FA04), Norgestrel and estrogen (G03FA10), Medroxyprogesterone and estrogen (G03FA12) |
|                                | Progesterone    | Megestrol (L02AB01)                                                                                                                                                                                                                                                                                                                                 |
|                                | Other hormones  | Somatropin (H01AC01), Thyroid (H03AA05)                                                                                                                                                                                                                                                                                                             |
| Anti-infective                 | Anti-infective  | Nitrofurantoin (J01XE01)                                                                                                                                                                                                                                                                                                                            |
| Blood and blood-forming organs | Antithrombotics | Dipyridamole oral short-acting does not apply to the extended-release combination with aspirin (B01AC07)                                                                                                                                                                                                                                            |
| Genitourinary system           | Genitourinary   | Desmopressin (H01BA02)                                                                                                                                                                                                                                                                                                                              |

\*Drug names with bold font and star marks are unavailable in Taiwan. N/A=ATC code not available.



**Table S3 |** Drugs with ATC code in PRISCUS criteria

| Category               | Subtypes                                               | Drugs name (ATC code)                                                                                                                                                            |
|------------------------|--------------------------------------------------------|----------------------------------------------------------------------------------------------------------------------------------------------------------------------------------|
| Cardiovascular System  | Antihypertensive agents and other cardiovascular drugs | Clonidine (C02AC01), Doxazosin (C02CA04), Methyldopa (C02AB01), Methyldopa (C02AB02), Nifedipine (C08CA05), Prazosin (C02CA01), Reserpine (C02AA02), Terazosin (G04CA03)         |
|                        | Antiarrhythmic                                         | Digoxin (C01AA05), Flecainide (C01BC04), Metildigoxin (C01AA08), Quinidine (C01BA01), Sotalol (C07AA07)                                                                          |
| Genitourinary system   | Anticholinergic drugs, Genitourinary                   | Oxybutynin (G04BD04), Solifenacin (G04BD08), Tolterodine (G04BD07)                                                                                                               |
| Musculoskeletal system | Muscle relaxants                                       | Baclofen (M03BX01)                                                                                                                                                               |
|                        | NSAID                                                  | Acemetacin (M01AB11), Etoricoxib (M01AH05), Indometacin (M01AB01), ketoprofen (M01AE03), Meloxicam (M01AC06), Pethidine (N02AB02), Phenylbutazone (M01AA01), Piroxicam (M01AC01) |
| Central nervous system | Antidepressants                                        | Amitriptyline (N06AA09), Clomipramine (N06AA04), Doxepin (N06AA12), Fluoxetine (N06AB03), Imipramine (N06AA02), Maprotiline (N06AA21)                                            |
|                        | Anti-dementia drugs                                    | Nicergoline (C04AE02), Pentoxifylline (C04AD03), Piracetam (N06BX03)                                                                                                             |
|                        | Antiepileptic drugs                                    | Phenobarbital (N03AA02)                                                                                                                                                          |
|                        | Antipsychotics                                         | Clozapine (N05AH02), Fluphenazine (N05AB02), Haloperidol (N05AD01), Levomepromazine (N05AA02), Olanzapine (N05AH03), Perphenazine (N05AB03), Thioridazine (N05AC02)              |
|                        | Ergotamine                                             | Dihydroergotoin (C04AE01), Ergotamine (N02CA52), Ergotamine (N02CA72)                                                                                                            |

|                                |                                    |                                                                                                                                                                                                                                                                                                                                                                                                                                                                                                                                                                                      |
|--------------------------------|------------------------------------|--------------------------------------------------------------------------------------------------------------------------------------------------------------------------------------------------------------------------------------------------------------------------------------------------------------------------------------------------------------------------------------------------------------------------------------------------------------------------------------------------------------------------------------------------------------------------------------|
|                                | Sedatives, hypnotic agents         | Alprazolam (N05BA12), Bromazepam (N05BA08), Brotizolam (>0.125 mg/d) (N05CD09), Chlordiazepoxide (N05BA02), Clobazam (N05BA09), Diazepam (N05BA01), Diphenhydramine (R06AA02), Dipotassium clorazepate (N05BA05), Doxylamine (R06AA09), Flunitrazepam (N05CD03), Flurazepam (N05CD01), Lorazepam (>2 mg/d) (N05BA06), Lormetazepam (>0.5 mg/d) (N05CD06), Medazepam (N05BA03), Nitrazepam (N05CD02), Oxazepam (>60 mg/d) (N05BA04), Prazepam (N05BA11), Temazepam (N05CD07), Triazolam (N05CD05), Zaleplon (N05CF03), Zolpidem (>5 mg/d) (N05CF02), Zopiclone (>3.75 mg/d) (N05CF01) |
| Respiratory                    | Antihistamine                      | Chlorpheniramine (R06AB02), Clemastine (R06AA04), Dimetindene (R06AB03), Hydroxyzine (N05BB01), Triprolidine (R06AX07)                                                                                                                                                                                                                                                                                                                                                                                                                                                               |
| Anti-infective                 | Antibiotics                        | Nitrofurantoin (J01XE01)                                                                                                                                                                                                                                                                                                                                                                                                                                                                                                                                                             |
| Blood and blood-forming organs | Inhibitors of platelet aggregation | Prasugrel (B01AC22), Ticlopidine (B01AC05)                                                                                                                                                                                                                                                                                                                                                                                                                                                                                                                                           |
| Gastrointestinal system        | Antiemetic drugs                   | Dimenhydrinate (R06AA02)                                                                                                                                                                                                                                                                                                                                                                                                                                                                                                                                                             |
